# Supplementary material
Source: PubMed Central journal article supplement (PMC3186292)
Supplement: supp_111.182873_JPET182873_supplemetaryFig1.pdf [file supp_111.182873_JPET182873_supplemetaryFig1.pdf]

Amit K Mitra, Kristine R Crews, Stanley Pounds, Xueyuan Cao, Tanya Feldberg, Yogita Ghodke, Varsha Gandhi, William Plunkett, M. Eileen Dolan, Christine Hartford, Susana Raimondi, Dario Campana, James Downing, Jeffrey E Rubnitz, Raul C Ribeiro, and Jatinder K. Lamba.

Journal of Pharmacology and Experimental Therapeutics

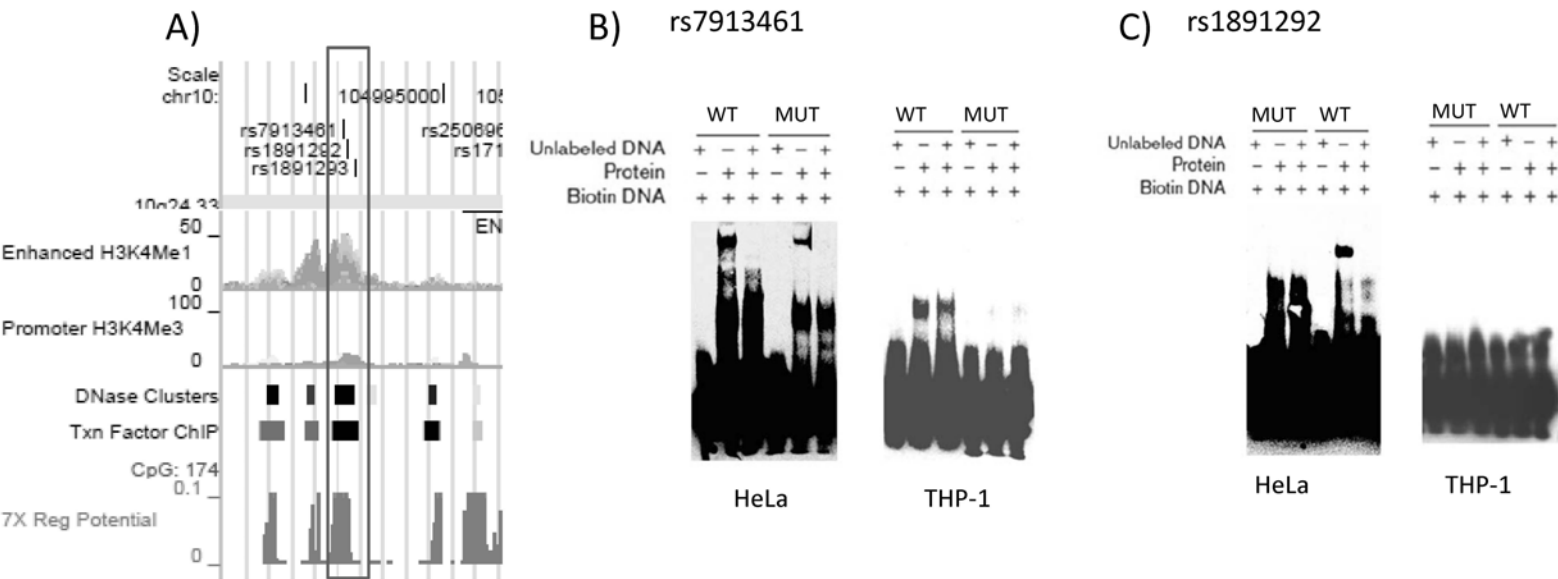

**Supplementary Fig 1.** A) Snapshot from UCSC browser showing SNPs present within LD group CEU.12. These SNPs are present Upstream of NT5C2 and as shown in the box three of these rs7913461, rs1891292 and rs1891293 are present in the region of high 7x regulatory potential as well as region with high DNaseI hypersensitivity. B and C) Representative EMSA gels comparing binding of oligos representing WT and variant alleles of SNPs after incubation with HeLa and THP-1 nuclear extracts.
