# Supplementary material
Source: PubMed Central journal article supplement (PMC3186292)
Supplement: supp_111.182873_JPET182873_TABLE.pdf [file supp_111.182873_JPET182873_TABLE.pdf]

1 **Manuscript Title: Genetic variants in NT5C2 are associated with its expression and cytarabine sensitivity in HapMap cell lines and in AML**  
2 **patients.**

3 Amit K Mitra, Kristine R Crews, Stanley Pounds, Xueyuan Cao, Tanya Feldberg, Yogita Ghodke, Varsha Gandhi, William Plunkett, M. Eileen Dolan,  
4 Christine Hartford, Susana Raimondi, Dario Campana, James Downing, Jeffrey E Rubnitz, Raul C Ribeiro, and Jatinder K. Lamba.

5 Journal of Pharmacology and Experimental Therapeutics

6

**Supplementary TABLE 1. PCR primers and conditions used for resequencing of NT5C2 gene.**

| <b>Amplicon ID</b>   | <b>FORWARD PRIMER</b>   | <b>REVERSE PRIMER</b> | <b>PCR Cycle Conditions</b>                                          | <b>Product Length (bp)</b> |
|----------------------|-------------------------|-----------------------|----------------------------------------------------------------------|----------------------------|
| <b>NT5C2_utrA</b>    | TTGCGAATAGTTTTCCCTTA    | CATCACCCAAGACTGAACCA  | 56°C for 1 min; 5% dimethyl sulfoxide; 1.5 mM MgCl <sub>2</sub>      | 1016bp                     |
| <b>NT5C2_utrB</b>    | GTCCTGCTTTGCTCTGATGA    | GACTCGGCCTAAGGAGAGG   | 56°C for 1 min 15 s; 5% dimethyl sulfoxide; 1.5 mM MgCl <sub>2</sub> | 1251bp                     |
| <b>NT5C2_EX1</b>     | TGAGGTAATTATGGGAGGGACA  | CAGTGGTTCCTGGGGTAAG   | 57°C for 45 s; 1.5 mM MgCl <sub>2</sub>                              | 620bp                      |
| <b>NT5C2_EX2</b>     | GAATGGGGAAACGAGCTGTA    | AGATTGCGCCATTGTACTCC  | 57°C for 1 min; 1.5 mM MgCl <sub>2</sub>                             | 926bp                      |
| <b>NT5C2_EX3</b>     | CAAACAGCATGTCGTGTATACAT | TCATGAGCCACATCTCAAGG  | 58°C for 30 s; 1.5 mM MgCl <sub>2</sub>                              | 429bp                      |
| <b>NT5C2_EX4.5</b>   | GGGGAAGAAGTGGGAAAGAG    | GTTTGGGTCCAAGTGCCTA   | 56°C for 1 min 15 s; 1.5 mM MgCl <sub>2</sub>                        | 1268bp                     |
| <b>NT5C2_EX6.7</b>   | GCTGGAACCTAAGCTGGACA    | TCACACAAACCTCCCACTCA  | 56°C for 1 min; 1.5 mM MgCl <sub>2</sub>                             | 913bp                      |
| <b>NT5C2_EX8</b>     | CAGGAAAGTCAGGGTGGAAA    | ATGGACCACTGTCATCCACA  | 55°C for 1 min; 1.5 mM MgCl <sub>2</sub>                             | 761bp                      |
| <b>NT5C2_EX9</b>     | TACTTGGGAGGCTGAAGTGG    | AAGCTAAGCGAACAATGCAA  | 55°C for 45 s; 1.5 mM MgCl <sub>2</sub>                              | 543bp                      |
| <b>NT5C2_EX10</b>    | TTAAAAGGTTCCCCATTCC     | CCAACAGCAGGGAAAGTCAT  | 54°C for 45 s; 1.5 mM MgCl <sub>2</sub>                              | 550bp                      |
| <b>NT5C2_EX11</b>    | AGTTCCAATTCCCCAATTC     | TTTTCTGGGTGGGTTCTGAC  | 55°C for 45 s; 1.5 mM MgCl <sub>2</sub>                              | 605bp                      |
| <b>NT5C2_EX12.13</b> | CTCCCCCTCTAGGTTCAAG     | CCCATGGAACCTTGAGAA    | 57°C for 1 min 15 s; 1.5 mM MgCl <sub>2</sub>                        | 1163bp                     |
| <b>NT5C2_EX14</b>    | AAAGCCAGCTTAATGGCAGA    | TAGGCATGGTTGGGGAAATA  | 53°C for 1 min; 1.5 mM MgCl <sub>2</sub>                             | 811bp                      |
| <b>NT5C2_EX15</b>    | GATGCTGGCTGTTGCTGTTA    | CTCAGCCTCCCAAATAGCTG  | 56°C for 45 s; 1.5 mM MgCl <sub>2</sub>                              | 672bp                      |
| <b>NT5C2_EX16.17</b> | CGAAACCCCATCTCTACCAG    | GACCCCTTCTTATGCAACCA  | 56°C for 1 min; 1.5 mM MgCl <sub>2</sub>                             | 772bp                      |
| <b>NT5C2_EX18</b>    | TGTAATTGCATGGCCACCTA    | TGCCAGAGTCACTGAGGATG  | 55°C for 1 min; 1.5 mM MgCl <sub>2</sub>                             | 876bp                      |

**Supplementary Table 2. Primers used for preparing NT5C2 reporter constructs.**

| <b>PRIMER ID</b>             | <b>SEQUENCE</b>      |
|------------------------------|----------------------|
| <b>rs10748839 PROCLO2 FP</b> | ccacccatcttatcactgag |
| <b>rs10748839 PROCLO2 RP</b> | ccccttgatggctaaaaaca |
| <b>rs11191612_Pro3_F</b>     | gctctcctgctgatcatgt  |
| <b>rs11191612_Pro3_R</b>     | gcagctgccacacagata   |
